# Supplementary material for: Excitonic properties of hydrogen saturation-edged armchair graphene nanoribbons
Source: Royal Society of Chemistry journal article supplement (doi:10.1039/c1nr10095e), 2011-01-01
Supplement: c1nr10095e.pdf [file c1nr10095e.pdf]

## Supplementary Information

# Excitonic properties of hydrogen saturation-edged armchair graphene nanoribbons

5

Min Wang<sup>1,2</sup>, Chang Ming Li<sup>1,2\*</sup>

<sup>1</sup>School of Chemical and Biomedical Engineering, Nanyang Technological University, 70 Nanyang Drive, Singapore  
637457

10 <sup>2</sup>Center for Advanced Bionanosystems, Nanyang Technological University, 70 Nanyang Drive, Singapore 637457

\* Corresponding author. Tel: +65 67904485; Fax: +65 67911761. E-mail: ecml@ntu.edu.sg.

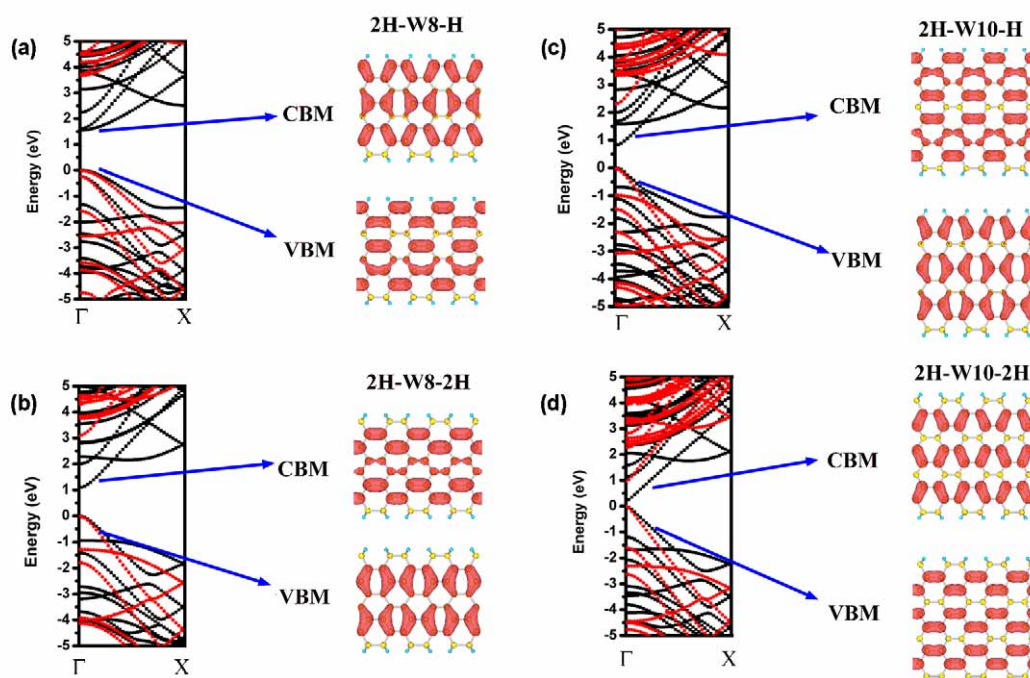

Fig. S1 Band structures and VBM/CBM plot for the (a) 2H-W8-H, (b) 2H-W8-2H, (c) 2H-W10-H, and (d) 2H-2W-2H  
15 structures. The black and red lines representative the LDA and GW parts respectively, the Fermi lever is set to zero. The  
isosurfaces ( $0.002 \text{ e/Bohr}^3$ ) for the VBM and CBM are denoted as red lobes.

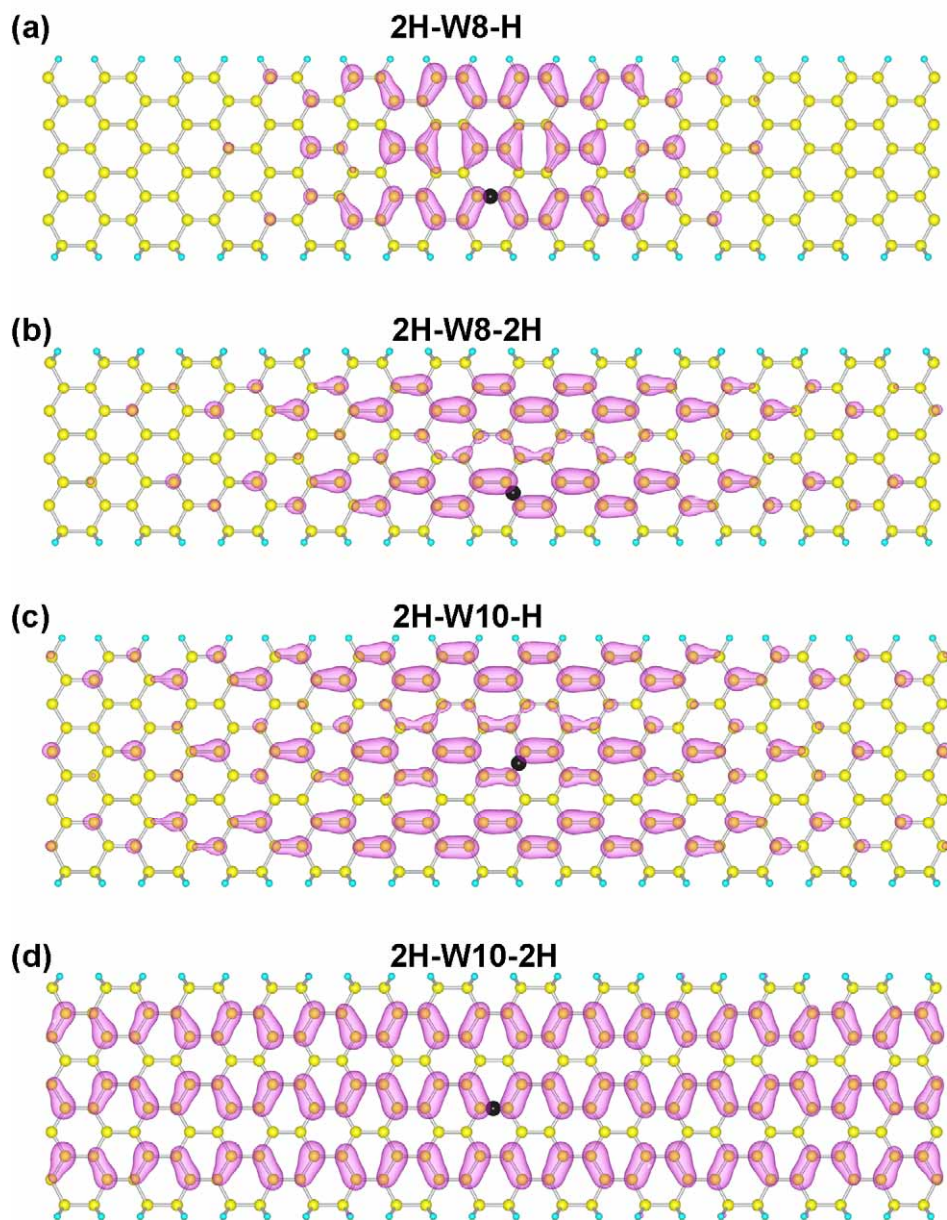

Fig. S2 Isosurfaces of exciton wavefunctions ( $0.01 \text{ e/Bohr}^3$ ) for (a) 2H-W8-H, (b) 2H-W8-2H, (c) 2H-W10-H, and (d) 2H-2W-2H structures are denoted as pink lobes. The hole is fixed in the middle of one bone and marked as black spot.
